# Supplementary material
Source: publisher figshare collection journal article supplement (https://tandf.figshare.com/ndownloader/files/14933510)
Supplement: Supplementary file 1 [file 14933510]

SUPPLEMENTARY DATA

ADSORPTION OF HYDROGEN SULFIDE, CARBON DIOXIDE, METHANE AND THEIR MIXTURES ON ACTIVATED CARBON

L. H. de Oliveira1,*, J. G. Meneguin1, M. V. Pereira1, J. F. do Nascimento2,

P. A. Arroyo1,⁑

1 Laboratory of Adsorption and Ion Exchange – Department of Chemical Engineering – State University of Maringá, Av. Colombo 5790, Zipcode 87020-900 – Maringá – PR – Brasil

2 PETROBRAS/CENPES/PDDP/TPP, Ilha do Fundão, Qd 07 – Rio de Janeiro – RJ – Brasil

* Corresponding author. E-mail leonardoh.deoliveira@gmail.com; phone: +55 44 3011 5311

⁑ E-mail: paarroyo@uem.br

**Absolute adsorbed amounts**

Absolute adsorbed amounts were obtained after rearranging the equation used to account gravity force balance acting in the adsorption system (Keller and Staudt, 2005), shown by:

|  | (S.1) |
| --- | --- |

where: *mexp* is the mass shown in display of the balance (kg); *ma* is the absolute amount adsorbed (kg); *ms* is the adsorbent mass (kg); *msc* is the mass of sample container (kg); *ρ* is the density of gas phase (kg m‑3), calculated with Peng-Robinson Equation of State (Peng and Robinson, 1976); *Va* is the volume of adsorbed phase (m³); *Vs* is the volume of solid (m³); *Vsc* is the volume of sample container (m³).

The volume of adsorbed phase can be calculated using:

|  | (S.2) |
| --- | --- |

where *ρa* is the density of adsorbed phase (kg m-3), considered equal to compound liquid density at its triple point. Table 1 in manuscript show *ρa* utilized in this work for CO2 and CH4.

*Vs* can be calculated utilizing:

|  | (S.3) |
| --- | --- |

where *ρs* is the adsorbent density (kg m-3), determined experimentally.

Considering the reduced isotherm, Ω (Keller and Staudt, 2005), given by:

|  | (S.4) |
| --- | --- |

and substituting in Equation 2, expression for absolute amount adsorbed is obtained:

|  | (S.5) |
| --- | --- |

where: *qeq* is the absolute amount adsorbed per adsorbent mass (mol kg-1); *M* is adsorbate molar mass (kg mol-1).

**Extent of chemisorbed quantity**

Hysteresis effect was determined through calculation of deviation in amount adsorbed at vacuum, Δ*qeq*(mol kg-1), for all temperatures studied, given by:

|  | (S.6) |
| --- | --- |

where: and are the amounts adsorbed in adsorption and desorption experiments (mol kg-1), respectively.

**Density of adsorbed phase**

In Table S1, liquid density at triple point for H2S, CO2 and CH4, used in Equation S.5, are shown.

**Table S1.** Liquid density at triple point for H2S, CO2 and CH4.

| Compound | *ρa* (kg m-3) | Literature |
| --- | --- | --- |
| H2S | 992.955 | Goodwin (1983) |
| CO2 | 1178.53 | Span and Wagner (1996) |
| CH4 | 451.53 | Setzmann and Wagner (1991) |

**References for Supplementary Data**

Goodwin, R. D. (1983). *Hydrogen Sulfide Provisional Thermophysical Properties From 188 to 700 K at pressures to 75 MPa, NBSIR 83-1694*.

Keller, J., & Staudt, R. (2005). *Gas Adsorption Equilibria. Experimental Methods and Adsorption Isotherms*. Springer Science + Business Media, Inc.

Peng, D.-Y., & Robinson, D. B. (1976). A New Two-Constant Equation of State. *Industrial & Engineering Chemistry Fundamentals*, *15*(1), 59–64. https://doi.org/10.1021/i160057a011

Setzmann, U., & Wagner, W. (1991). A New Equation of State and Tables of Thermodynamic Properties for MethaneCovering the Range from the Melting Line to 625 {K} at Pressures up to1000 {MPa}. *J. Phys. Chem. Ref. Data*, *20*(6), 1061–1151.

Span, R; Wagner, W. (1996). A new EOS for CO2 covering the fluid region from the triple point temperature to 1100K at pressures up to 800MPa.pdf. *Journal of Physical and Chemical Reference Data*. https://doi.org/10.1063/1.555991
